# Supplementary material for: Preparation of micron sized graphite using a spark plasma technique
Source: Royal Society of Chemistry journal article supplement (doi:10.1039/c6ra07710b), 2016-01-01
Supplement: c6ra07710b1.pdf [file c6ra07710b1.pdf]

## **Electronic Supplementary Information for Preparation of micron sized graphite by spark plasma**

Jiaying Li<sup>1,2,3</sup> \*, Xia Liu<sup>1</sup>, Cheng Cheng<sup>1</sup> \*, Tasawar Hayat<sup>3</sup>, Njud S. Alharbi<sup>3</sup>,

Ahmed Alsaedi<sup>3</sup>, Xiangke Wang<sup>2,3</sup>

1: Institute of Plasma Physics, Chinese Academy of Sciences, P.O. Box 1126, Hefei,  
230031, P. R. China

2: School for Radiological and Interdisciplinary Sciences, Soochow University,  
Suzhou 215123, P. R. China

3: NAAM Research Group, Faculty of Science, King Abdulaziz University, Jeddah  
21589, Saudi Arabia.

\*: Corresponding authors: lijx@ipp.ac.cn (J. Li)

Tel: +86-551-65596617; Fax: +86-551-65591310.

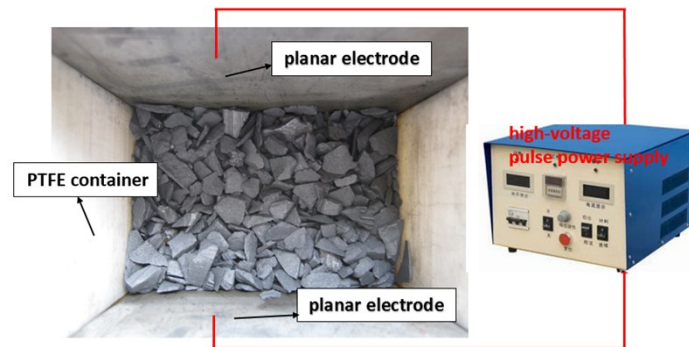

Fig. S1: Schematic illustration of the spark plasma technique.

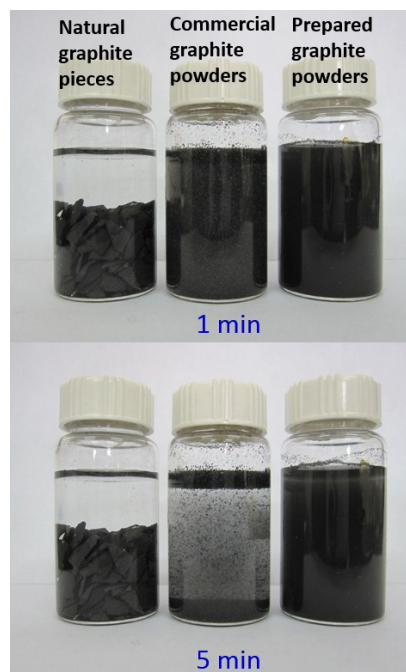

Fig. S2: The dispersion properties of the natural graphite, commercial graphite powders and the prepared micron sized graphite powders after setting aside for 5 min in aqueous solution.

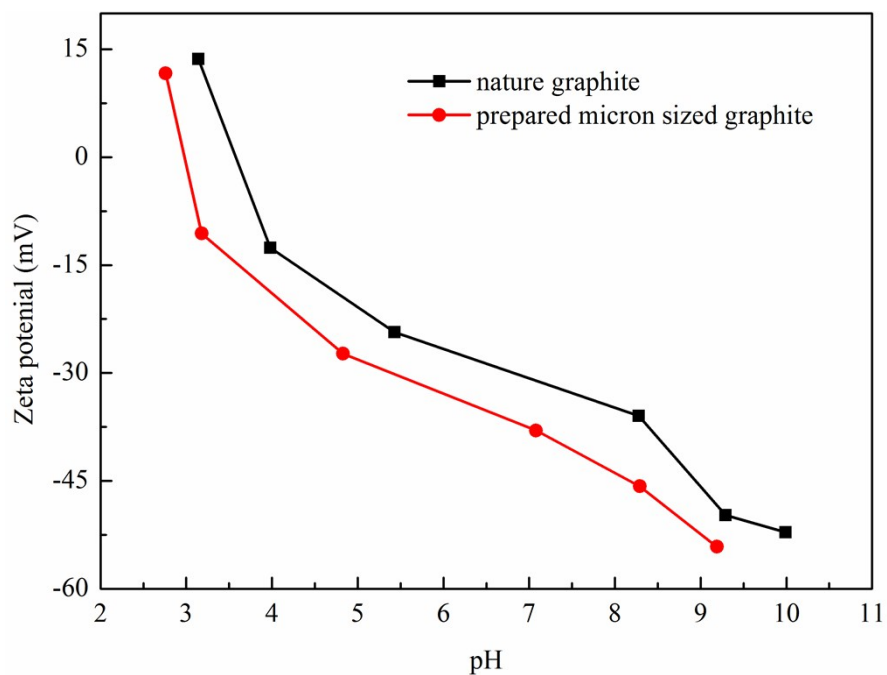

Fig. S3: The zeta potential of the commercial graphite powders and the prepared micron sized graphite

It can be seen from Fig. S3 that the zeta potential of the prepared micron sized graphite is lower than that of commercial graphite powder due to the more oxygen-containing functional groups on the surface.
